# Supplementary material
Source: PubMed Central journal article supplement (PMC5321136)
Supplement: NIHMS847138-supplement-1.pdf [file NIHMS847138-supplement-1.pdf]

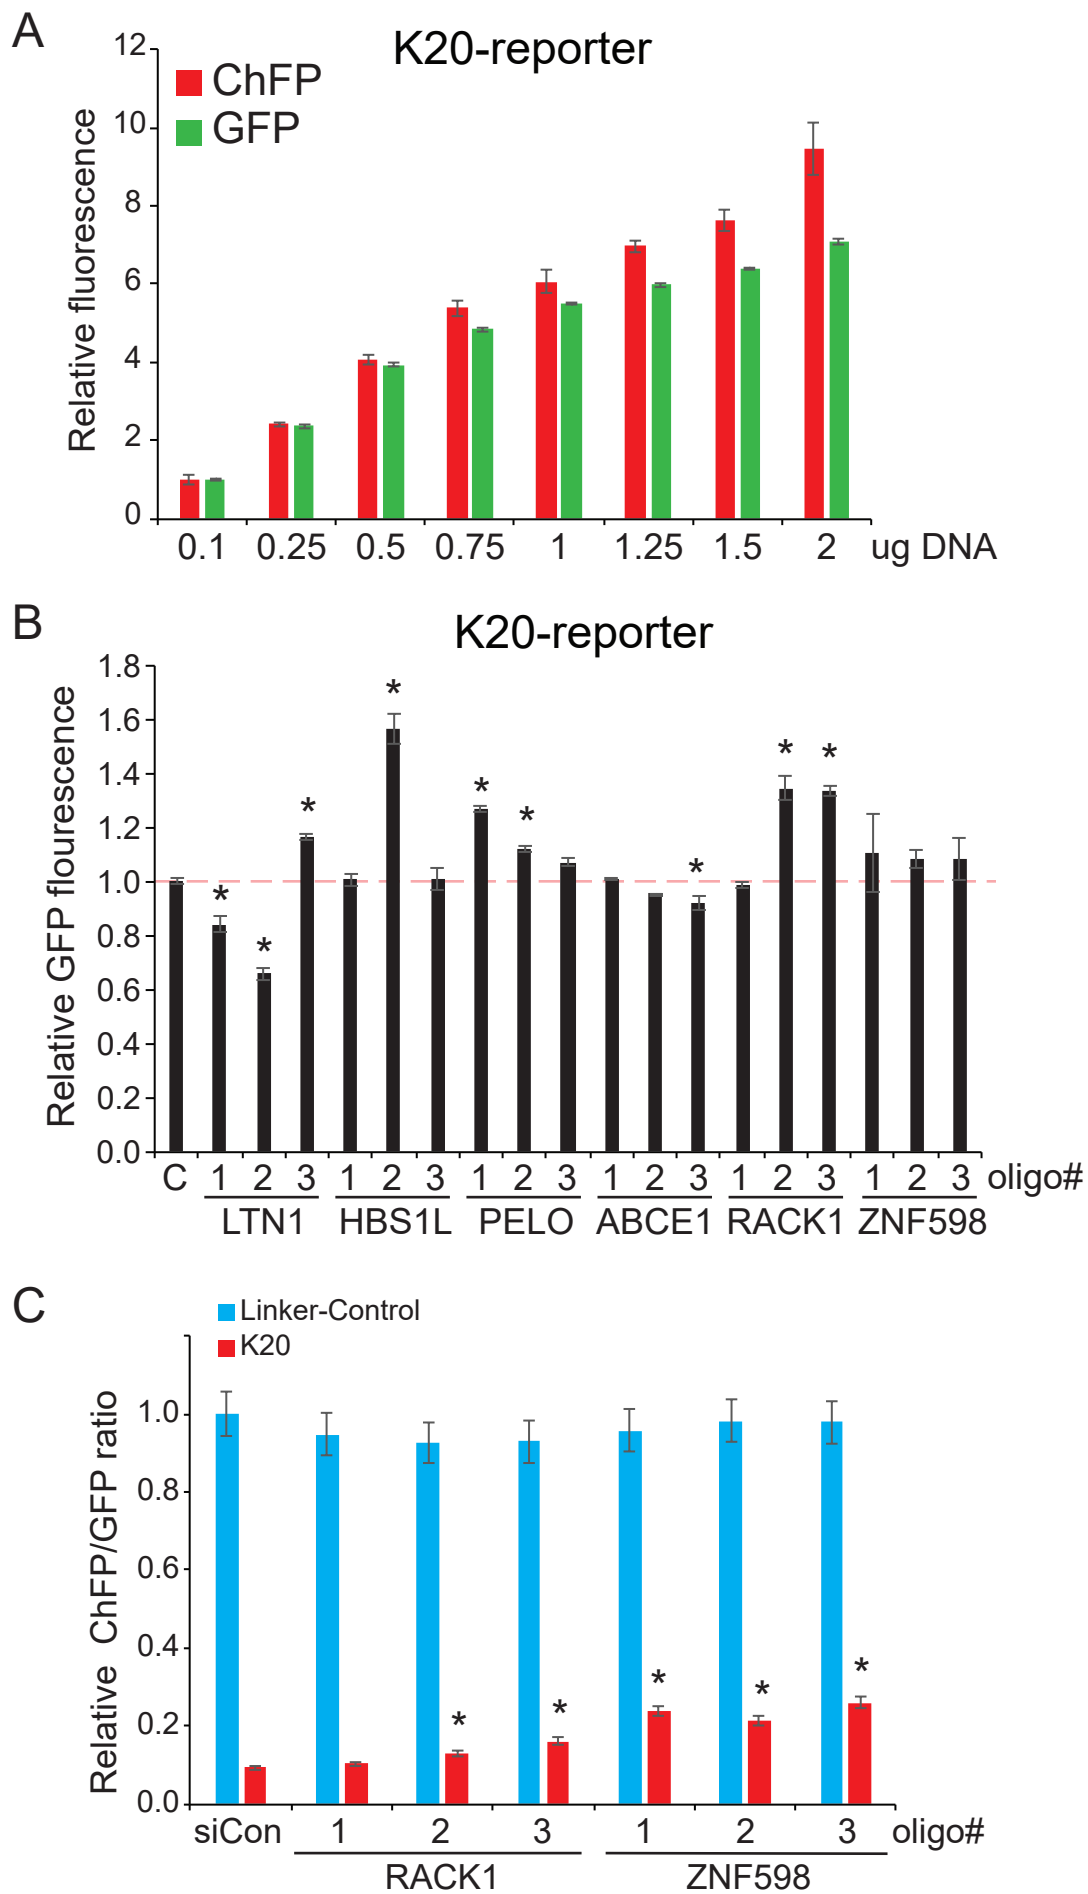

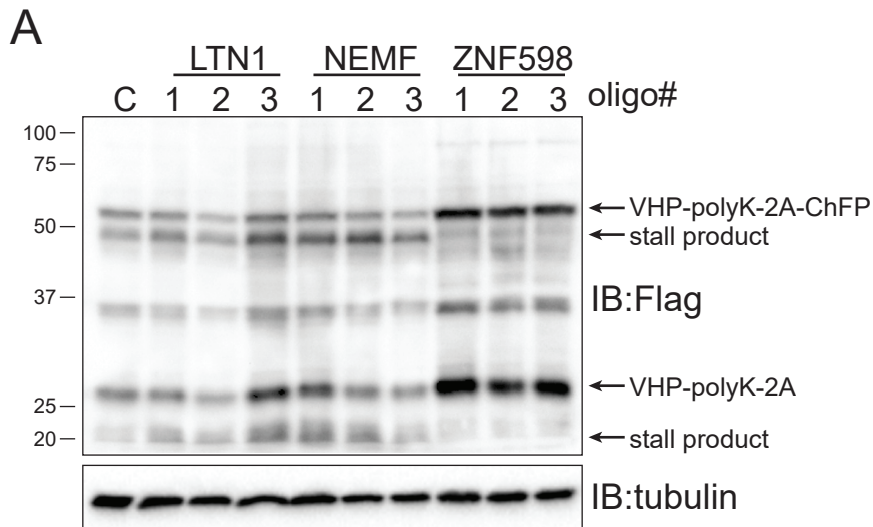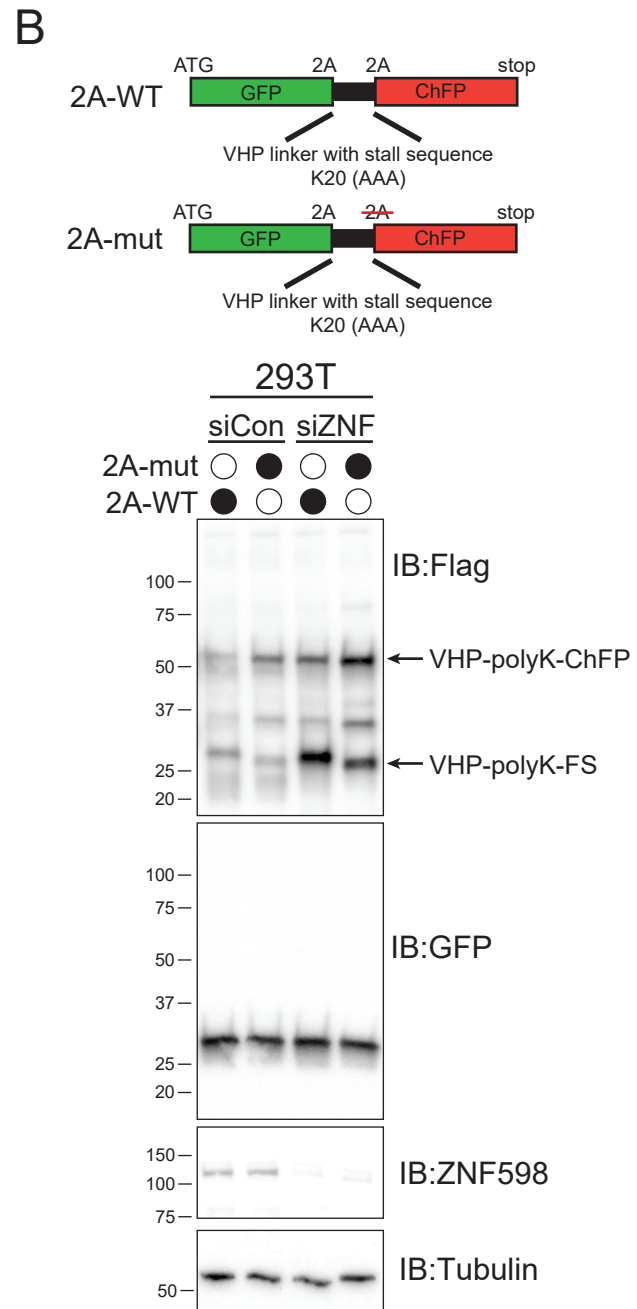

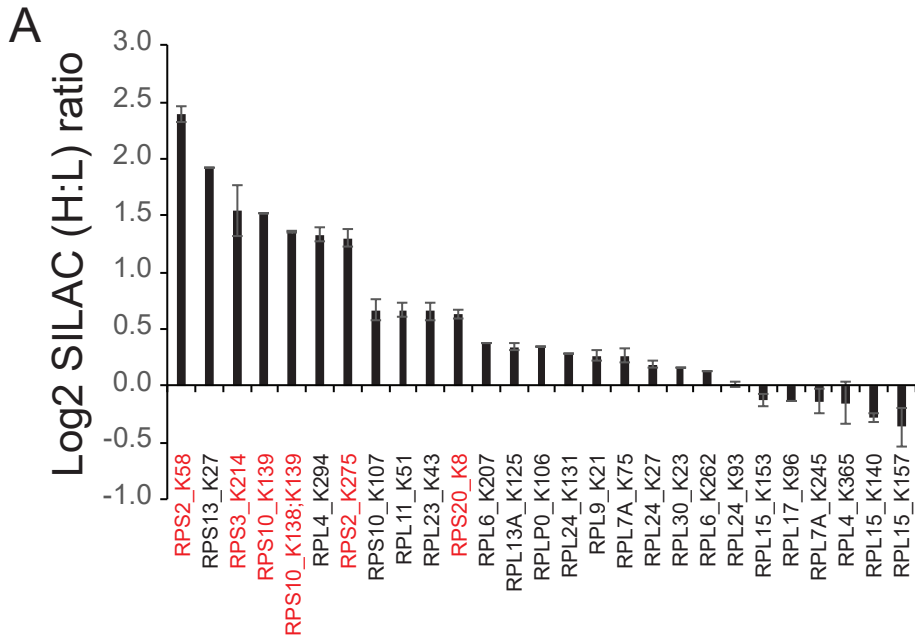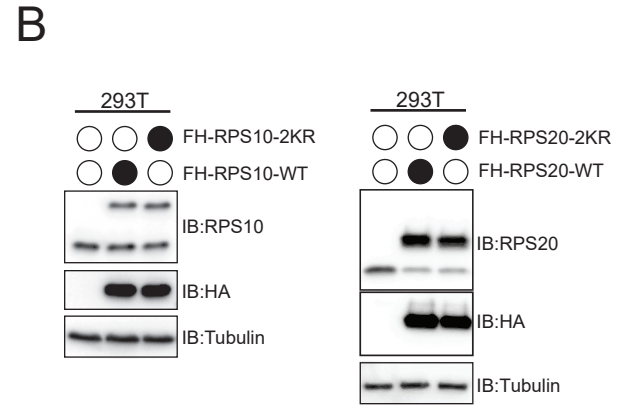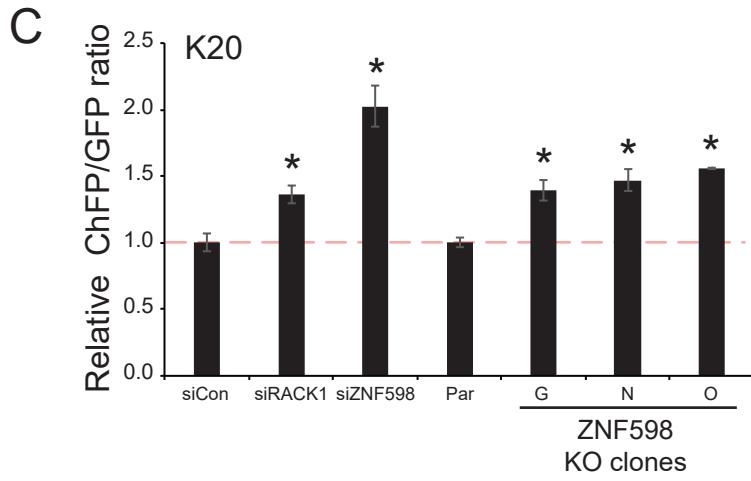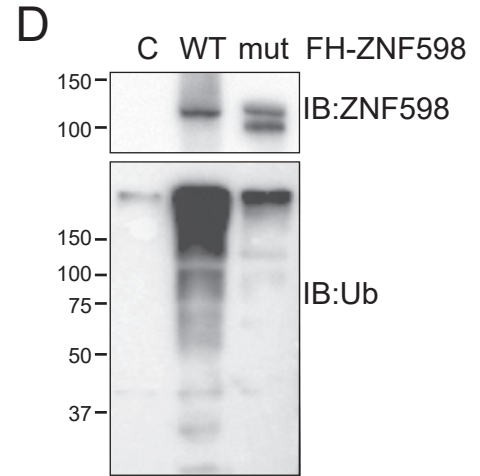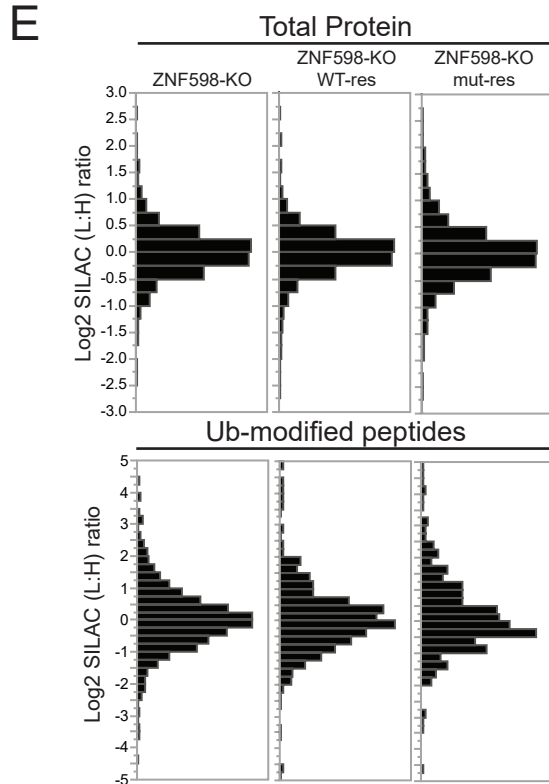

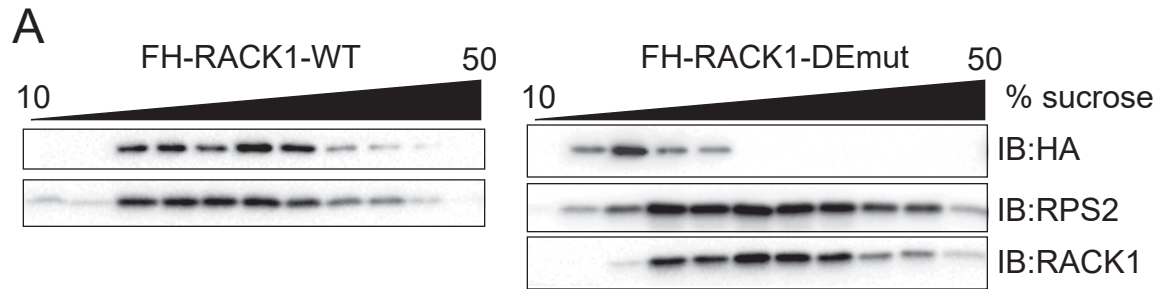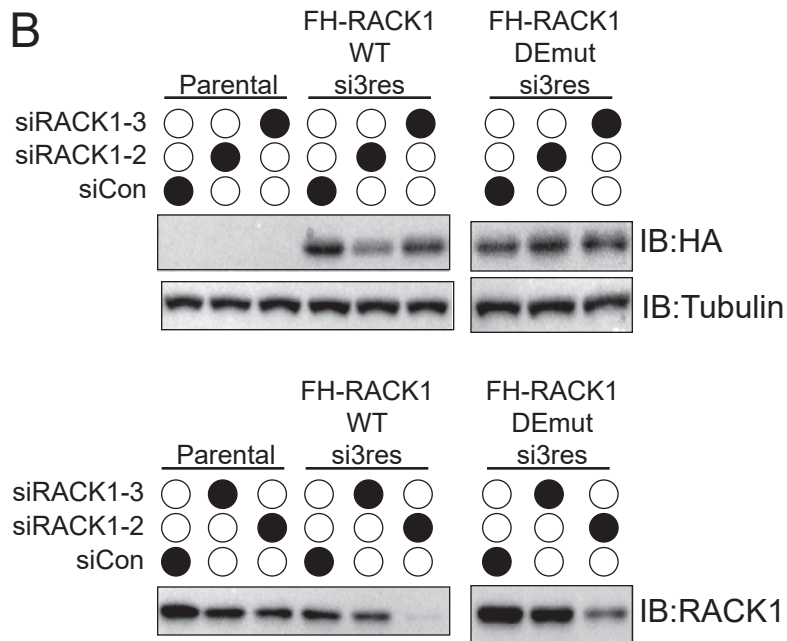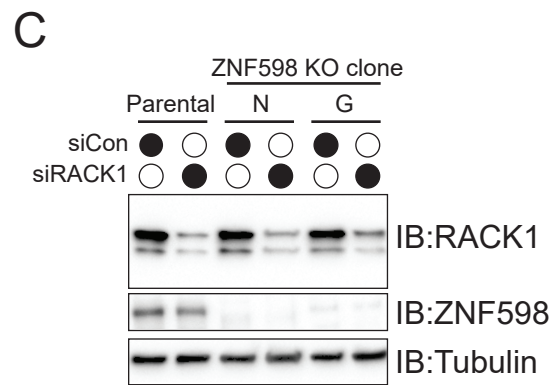

## Supplemental Figure Legends

### **Supplemental Figure S1 – GFP expression from the K20 reporter is minimally effected by loss of ribosome splitting factors. (Related to Figure 1)**

A) 293T cells were transfected with increasing amounts of the K20-containing dual fluorescence reporter plasmid. The relative GFP (green bars) or ChFP (red bars) fluorescence is indicated.

B) 293T cells were transfected with control siRNA or three separate siRNA oligos targeting the indicated genes and subsequently transfected with either a no-stall linker control (blue bars) or the K20-containing (red bars) dual fluorescence reporter. The relative ChFP:GFP ratio is depicted with all data relative to the linker-control sample with control siRNA. Error bars represent SEM for three separate transfections and flow cytometry measurements. \*= p-value of < 0.01 using Student's t-test comparing K20 ChFP:GFP ratios in the siRNA control to siRNAs targeting RACK1 or ZNF598.

C) 293T cells were transfected with three separate siRNA oligos targeting the indicated genes and subsequently transfected with the K20-containing dual fluorescence reporter. The relative GFP fluorescence is depicted. C = control scrambled siRNA. Error bars represent SEM for three separate transfections and flow cytometry measurements. \*= p-value of < 0.01 using Student's t-test compared to control transfections.

### **Supplemental Figure S2 – Loss of ZNF598 allows for read-through of polyA-induced ribosome stalls in multiple reading frames (Related to Figure 1)**

A) Whole cell lysates from 293T cells were transfected with three separate siRNA oligos targeting the indicated genes and subsequently transfected with the K20-containing dual fluorescence reporter were immunoblotted with the indicated antibodies. Arrows depict various translation products from the K20 stall reporter plasmid. C = control scrambled siRNA.

B) 293T cells were transfected with control siRNA or an siRNA oligo targeting ZNF598 (oligo #2) and subsequently transfected with the wild type K20-containing dual fluorescence reporter (2A-WT) or one in which the second 2A skipping sequence that separates the VHP-polyA sequence from the cherry fluorescent protein coding sequence was mutated (2A-mut). Whole cell lysates were immunoblotted with the indicated antibodies. Translation products arising from frameshifting (FS) events are indicated.

**Supplemental Figure S3 – Regulatory ubiquitylation of RPS20 and RPS10 is mediated by ZNF598 and facilitates ribosome-associated QC events. (Related to Figure 2)**

A) HCT116 cells were either untreated (light label) or treated with anisomycin for 4hrs (heavy). After harvesting, cells were mixed and ubiquitin-modified peptides were isolated from tryptic-digests of whole cell extracts. The Log<sub>2</sub> SILAC ratio (H:L) for selected ubiquitin-modified peptides from ribosomal proteins is depicted. 40S ribosomal ubiquitylation events interrogated in this study are shown in red. The site of ubiquitin-modification is indicated. Error bars represent SEM from multiple peptide MS quantifications. This data was extracted from a previously published study (Higgins et al., 2015).

B) Whole cell extracts from either parental 293T cells or cells with stable expression of Flag-HA (FH) tagged wild type (WT) RPS20 or RPS10 or versions containing the indicated lysine to arginine mutations were immunoblotted with the indicated antibodies.

RPS20-2KR=K4R;K8R, RPS10-2KR=K138R;K139R.

C) HCT116 cells transfected with control siRNA (siCon) or siRNA targeting RACK1 or ZNF598 were subsequently transfected with the K20-containing dual fluorescence reporter and the resulting relative ChFP:GFP ratio is depicted. Parental HCT116 cells or three separate ZNF598 knockout (KO) clones were transfected with the K20-containing dual fluorescence reporter and the resulting relative ChFP:GFP ratio is depicted. Error bars represent SEM for three separate

transfections and flow cytometry measurements. \*= p-value of < 0.01 using Student's t-test comparing siControl treated cells to siRNAs targeting RACK1 or ZNF598 or ZNF598-KO clones.

D) Wild type or RING-mutant (C29A) Flag-HA-tagged (FH) ZNF598 was isolated from whole cell lysates from stable expression cell lines using anti-Flag agarose. Eluted proteins were added to *in vitro* ubiquitylation reactions. Reaction products were separated by SDS-PAGE and visualized by immunoblotting with the indicated antibodies. C indicates control reactions with no added ZNF598.

E) Distribution of Log<sub>2</sub> SILAC ratios (L:H) for all quantified proteins (top) or ubiquitin-modified peptides (bottom) from the indicated cells mixed with heavy-labeled parental cells prior to sample preparation and subsequent analysis by mass spectrometry.

#### **Supplemental Figure S4 – Ribosome-associated RACK1 facilitates RRub and ribosome-associated QC. (Related to Figure 4)**

A) Native whole cell lysates from cells expressing siRNA-resistant versions of Flag-HA-tagged wild type RACK1 or DEmut RACK1 (R36D;K38E) were separated on a 10-50% linear sucrose gradient and collected fractions were immunoblotted with the indicated antibodies.

B) Parental 293T cells or cells expressing siRNA-resistant versions (resistant to siRNA #3) of Flag-HA-tagged wild type RACK1 or DEmut RACK1 were transfected with control siRNA or two separate RACK1 targeting siRNAs. Whole cell extracts were immunoblotted as indicated. Note that the samples blotted for RACK1 were loaded in a different order.

C) Parental HCT116 cells or two separate ZNF598-KO clones (G, N) were transfected with control siRNA or siRNA targeting RACK1 (oligo#3). Whole cell extracts were immunoblotted with the indicated antibodies.

#### **Supplemental Table 1 – Ub-modified peptides altered upon ZNF598 perturbation. (Related to Figure 2)**

Description of column headers

Protein ID – Uniprot accession matching to ub-modified peptide identified

Gene\_Symbol - Uniprot gene symbol matching to ub-modified peptide identified

prot\_description – Description of the matching protein

Site position – position of ub-modified lysine residue based on the given protein accession

Sequence – sequence of the identified ub-modified peptide; #-signifies ub-modified lysine; \*-signifies oxidized methionine

ZNFKO\_TSCs – total spectral counts for the listed ub-modified peptide in SILAC samples from ZNF598 knockout cell lines.

ZNFKO\_WTres\_TSCs – total spectral counts for the listed ub-modified peptide in SILAC samples from ZNF598 knockout cell lines with rescued expression of wild type ZNF598.

ZNFKO\_Mutres\_TSCs – total spectral counts for the listed ub-modified peptide in SILAC samples from ZNF598 knockout cell lines with rescued expression of mutant ZNF598.

median\_Light\_Heavy – the median value for all SILAC ratios (log<sub>2</sub> of the L:H ratio) quantified for the corresponding ub-modified peptide

standard\_deviation - the standard deviation for all SILAC ratios (log<sub>2</sub> of the L:H ratio) quantified for the corresponding ub-modified peptide

num\_quant – the number of quantified peptides used to determine SILAC ratios (log<sub>2</sub> of the L:H ratio) for the corresponding ub-modified peptide

**Supplemental Table 2 – Table of sequence-based reagents. (Related to Star Methods)**
